# Supplementary material for: Investigation of Corrosion Behavior of Oxygen-Free Copper Canisters in Groundwater Chemistry of Deep Geological Repositories
Source: MDPI journal article supplement (doi:10.3390/ma17010074), 2023-12-22
Supplement: s1 [file s1]

## Supplementary

1. Open Circuit Potential (OCP) plot for Artificial Groundwater (AG) and Procured Groundwater (PG), along with the equivalent circuit for Electrochemical Impedance Spectroscopy (EIS) fitting.

(a)

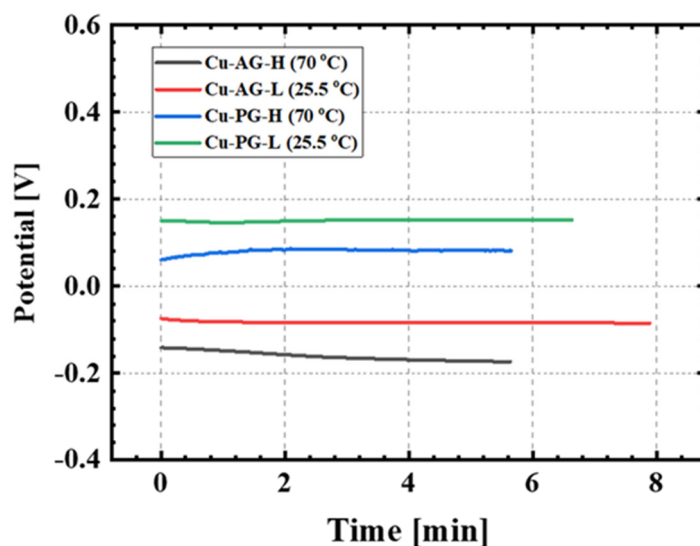

(b)

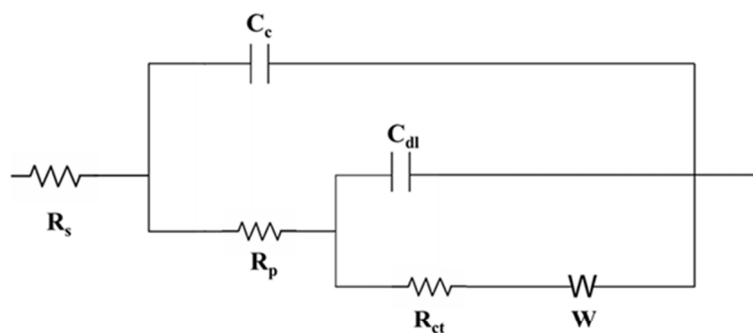

(c)

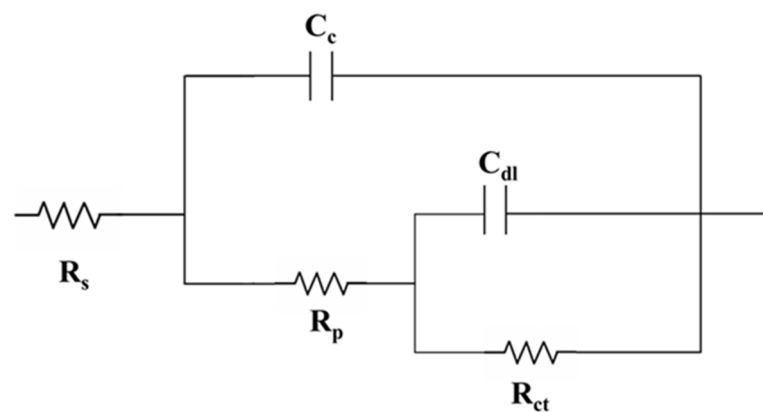

**Figure S1.** (a) the OCP plot, (b and c) the equivalent circuit utilized for the EIS fitting.

2. Visual representations of the groundwater solution before and after the immersion test

**(a)**

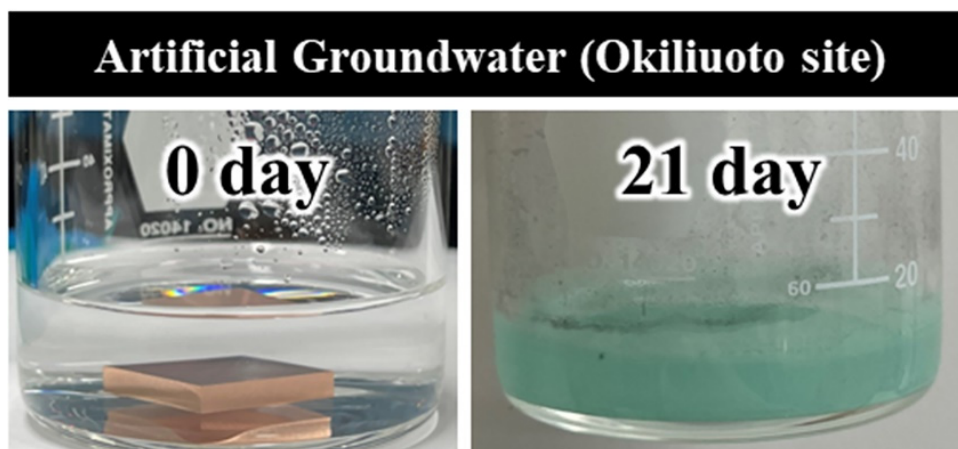

**(b)**

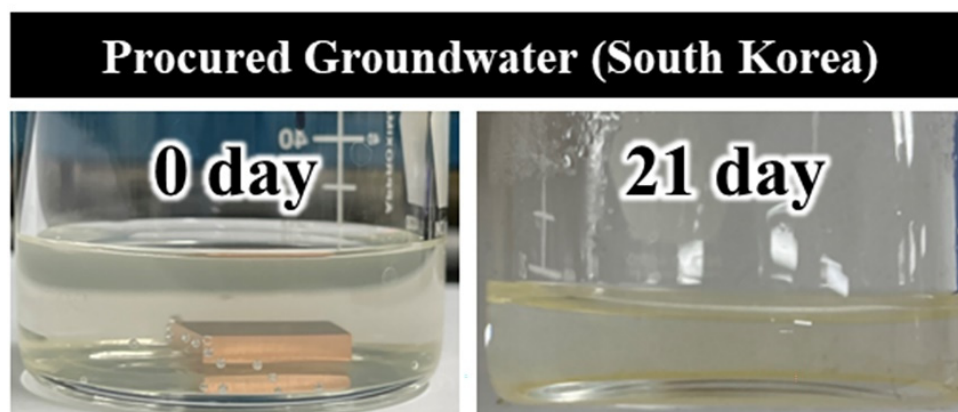

**Figure S2.** Visual representations of the groundwater solution before and after the immersion test (a) AG solution and (b) PG solution.
